# Supplementary material for: Age-related epithelial defects limit thymic function and regeneration
Source: PubMed Central journal article supplement (PMC11362016; doi:10.1038/s41590-024-01915-9), 2024-08-07
Supplement: 41590_2024_1915_MOESM1_ESM.pdf [file 41590_2024_1915_MOESM1_ESM.pdf]

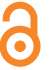

---

# Age-related epithelial defects limit thymic function and regeneration

---

In the format provided by the authors and unedited

# Supplementary Figure 1

**a**

## Metadata info

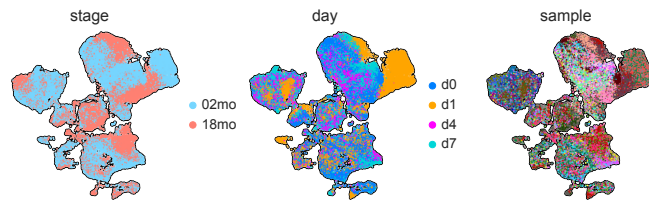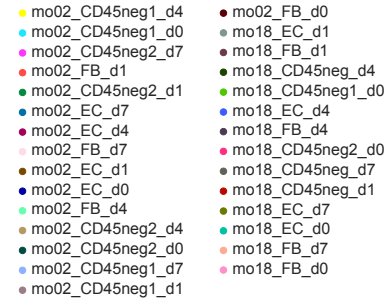

## QC info

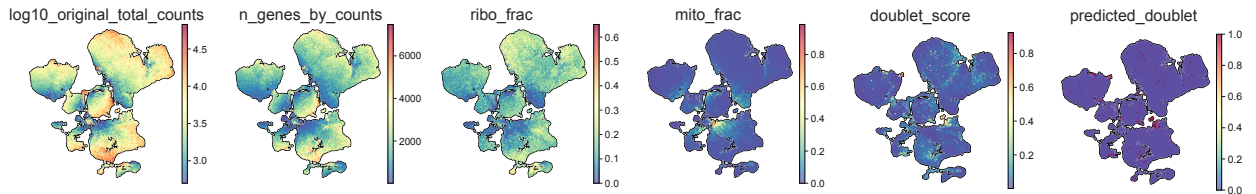

## Contaminants

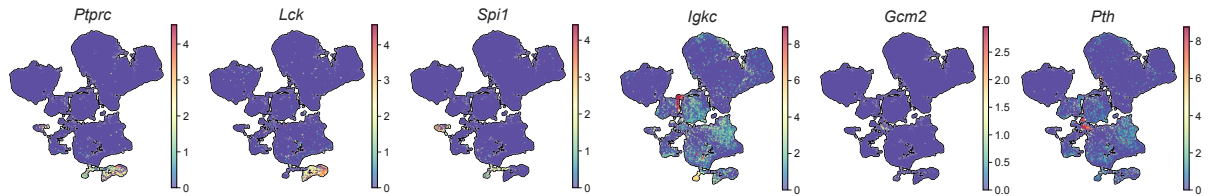

**b**

## Number of cells to discard after QC

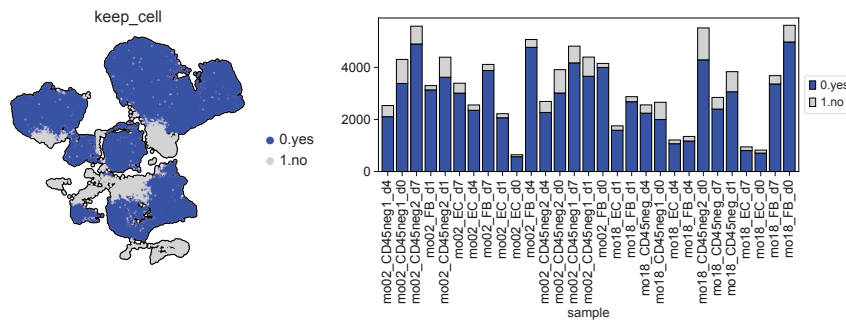

**Supplementary Figure 1: a**, UMAPs of 93,738 CD45<sup>-</sup> cells from 2mo or 18mo thymus at baseline (day 0) and at days 1, 4 and 7 after TBI prior to quality control. UMAPs in sequence display age cohort, day after TBI and origin sample (Metadata info); total counts in log10 scale, number of genes, ribosomal fraction, and mitochondrial fraction per cell (QC info); CD45<sup>+</sup> and parathyroid contaminating cells expressing *Ptprc*, *Lck*, *Spi1*, *Igkc* and *Gcm2*, *Pth* genes respectively (Contaminants). **b**, UMAP and associated stacked barplot representation of filtered out cells on a per sample basis. Cells retained for further processing are shown in blue, while cells removed are shown in grey.

## Supplementary Figure 2

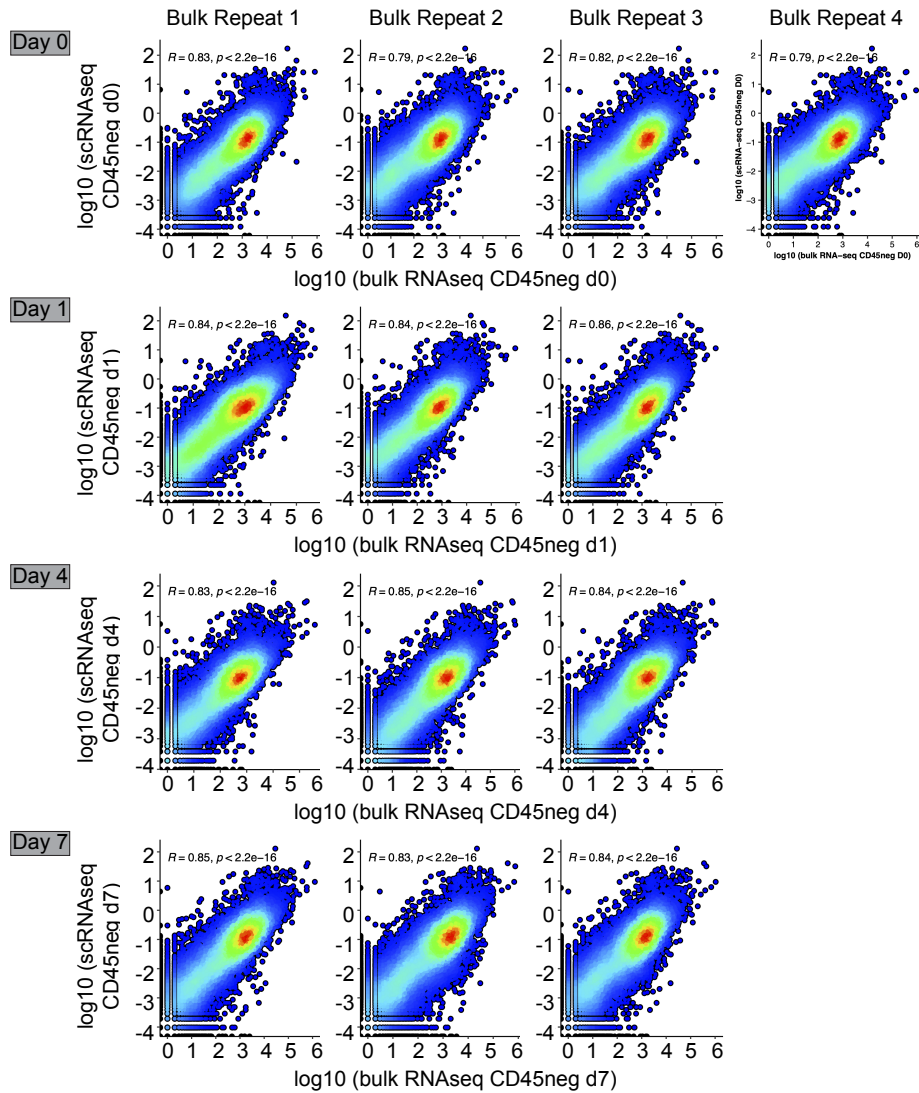

**Supplementary Figure 2:** Scatterplots showing correlation (Pearson) between averaged expression profiles of CD45- scRNA-seq averaged technical replicates collected at steady state (row 1), day 1 (row 2), day 4 (row 3) and day 7 (row 4) after TBI versus the expression profiles of CD45- bulk RNA-seq biological replicates (replicate 1; column 1, replicate 2; column 2, replicate 3; column 3, replicate 4; column 4) obtained on the same timeframe.

**Supplementary Table 11: Gating strategy for cell subset analysis by flow cytometry**

| Subset              | Flow phenotype                                                                                                                                                                   | Figure                                             |
|---------------------|----------------------------------------------------------------------------------------------------------------------------------------------------------------------------------|----------------------------------------------------|
| EC                  | LiveTER119 <sup>-</sup> CD45 <sup>-</sup> CD31 <sup>+</sup> PDGFRa <sup>-</sup>                                                                                                  | Ext Fig. 1                                         |
| Fibroblast          | LiveTER119 <sup>-</sup> CD45 <sup>-</sup> CD31 <sup>-</sup> PDGFRa <sup>+</sup>                                                                                                  |                                                    |
| mTEC                | LiveTER119 <sup>-</sup> CD45 <sup>-</sup> EpCAM <sup>+</sup> MHCII <sup>+</sup> UEA1 <sup>hi</sup> Ly51 <sup>lo</sup>                                                            |                                                    |
| cTEC                | LiveTER119 <sup>-</sup> CD45 <sup>-</sup> EpCAM <sup>+</sup> MHCII <sup>+</sup> UEA1 <sup>lo</sup> Ly51 <sup>hi</sup>                                                            |                                                    |
| mTEC1               | LiveTER119 <sup>-</sup> CD45 <sup>-</sup> EpCAM <sup>+</sup> MHCII <sup>lo</sup> UEA1 <sup>hi</sup> Ly51 <sup>lo</sup> L1CAM <sup>-</sup> CD104 <sup>+</sup>                     | Figure 1                                           |
| mTEC2               | LiveTER119 <sup>-</sup> CD45 <sup>-</sup> EpCAM <sup>+</sup> MHCII <sup>+</sup> UEA1 <sup>hi</sup> Ly51 <sup>lo</sup> L1CAM <sup>-</sup> CD104 <sup>-</sup> Ly6D <sup>-</sup>    |                                                    |
| mTEC3               | LiveTER119 <sup>-</sup> CD45 <sup>-</sup> EpCAM <sup>+</sup> MHCII <sup>+</sup> UEA1 <sup>hi</sup> Ly51 <sup>lo</sup> L1CAM <sup>-</sup> CD104 <sup>-</sup> Ly6D <sup>+</sup>    |                                                    |
| TEC <sup>tuft</sup> | LiveTER119 <sup>-</sup> CD45 <sup>-</sup> EpCAM <sup>+</sup> MHCII <sup>+</sup> UEA1 <sup>hi</sup> Ly51 <sup>lo</sup> L1CAM <sup>+</sup>                                         |                                                    |
| DN-TEC              | LiveTER119 <sup>-</sup> CD45 <sup>-</sup> EpCAM <sup>+</sup> MHCII <sup>+</sup> UEA1 <sup>-</sup> Ly51 <sup>-</sup>                                                              |                                                    |
| aaTEC1              | LiveTER119 <sup>-</sup> CD45 <sup>-</sup> PDGFRa <sup>-</sup> CD31 <sup>-</sup> EpCAM <sup>+</sup> MHCII <sup>+</sup> UEA1 <sup>-</sup> Ly51 <sup>-</sup> Claudin-3 <sup>+</sup> | Figure 1j, Ext Data Fig. 4                         |
| aaTEC2              | LiveTER119 <sup>-</sup> CD45 <sup>-</sup> EpCAM <sup>-</sup> MHCII <sup>+</sup> PDPN <sup>+</sup> PDGFRa <sup>-</sup>                                                            |                                                    |
| capFB               | LiveTER119 <sup>-</sup> CD45 <sup>-</sup> CD31 <sup>-</sup> PDGFRa <sup>+</sup> CD26 <sup>+</sup> PDPN <sup>+</sup>                                                              | Ext Data Fig. 4                                    |
| medFB               | LiveTER119 <sup>-</sup> CD45 <sup>-</sup> CD31 <sup>-</sup> PDGFRa <sup>+</sup> CD26 <sup>-</sup> PDPN <sup>+</sup>                                                              |                                                    |
| intFB               | LiveTER119 <sup>-</sup> CD45 <sup>-</sup> CD31 <sup>-</sup> PDGFRa <sup>+</sup> PDPN <sup>-</sup>                                                                                |                                                    |
| aEC                 | LiveTER119 <sup>-</sup> CD45 <sup>-</sup> CD31 <sup>+</sup> PDGFRa <sup>-</sup> CD309 <sup>-</sup> CD62P <sup>-</sup>                                                            | Ext Data Fig. 4                                    |
| capEC               | LiveTER119 <sup>-</sup> CD45 <sup>-</sup> CD31 <sup>+</sup> PDGFRa <sup>-</sup> CD309 <sup>+</sup>                                                                               |                                                    |
| vEC                 | LiveTER119 <sup>-</sup> CD45 <sup>-</sup> CD31 <sup>+</sup> PDGFRa <sup>-</sup> CD309 <sup>-</sup> CD62P <sup>+</sup>                                                            |                                                    |
| Pericyte            | LiveTER119 <sup>-</sup> CD45 <sup>-</sup> CD31 <sup>-</sup> PDGFRb <sup>+</sup> Ly51 <sup>+</sup> CD9 <sup>+</sup>                                                               | Ext Data Fig. 4                                    |
| vSMC                | LiveTER119 <sup>-</sup> CD45 <sup>-</sup> CD31 <sup>-</sup> PDGFRb <sup>+</sup> Ly51 <sup>-</sup> CD9 <sup>+</sup>                                                               |                                                    |
| Mesothelial         | LiveTER119 <sup>-</sup> CD45 <sup>-</sup> CD31 <sup>-</sup> PDGFRb <sup>-</sup> CD9 <sup>+</sup> PDPN <sup>+</sup>                                                               |                                                    |
| Tuft Cell           | LiveTER119 <sup>-</sup> CD45 <sup>-</sup> EpCAM <sup>+</sup> UEA1 <sup>hi</sup> Ly51 <sup>lo</sup> GFP <sup>+</sup> DCLK1 <sup>+</sup> Ly6D <sup>lo/-</sup>                      | Ext Data Fig. 7<br>(In Foxn1 <sup>nTnG</sup> mice) |
| Corneocyte          | LiveTER119 <sup>-</sup> CD45 <sup>-</sup> EpCAM <sup>+</sup> UEA1 <sup>hi</sup> Ly51 <sup>lo</sup> GFP <sup>+</sup> DCLK1 <sup>-</sup> Ly6D <sup>+</sup>                         |                                                    |
| M cell              | LiveTER119 <sup>-</sup> CD45 <sup>-</sup> EpCAM <sup>+</sup> UEA1 <sup>hi</sup> Ly51 <sup>lo</sup> GFP <sup>+</sup> GP2 <sup>+</sup> Ly6D <sup>lo/-</sup>                        |                                                    |

**Supplementary Table 12: Flow cytometry and cell sorting antibodies:**

| Antigen | Clone       | Fluorochrome | Vendor      | Cat#        | Lot#     | Dilution |
|---------|-------------|--------------|-------------|-------------|----------|----------|
| CD45    | 30-F11      | PercP-Cy5.5  | Biolegend   | 103132      | B363634  | 1/100    |
|         |             | PE-CF594     | BD          | 562420      | 0013784  | 1/300    |
|         |             | BUV615       | BD          | 751170      |          | 1/300    |
| CD31    | 390         | PercP-Cy5.5  | Biolegend   | 102420      | B247171  | 1/1300   |
| TER119  | TER-119     | PercP-Cy5.5  | Biolegend   | 116228      | B356105  | 1/100    |
|         |             | BUV563       | BD          | 741257      | 2265032  | 1/500    |
|         |             | PE-Cy5.5     | Invitrogen  | 35-5921-82  |          | 1/650    |
| MHCII   | M5/114.15.2 | BV421        | Biolegend   | 107631      | B360795  | 1/300    |
|         |             | BV711        | Biolegend   | 107631      | B377900  | 1/400    |
|         |             | APC-e780     | Invitrogen  | 47-5321-82  |          | 1/2000   |
| EpCAM   | G8.8        | APC-Cy7      | Biolegend   | 118218      | B393333  | 1/100    |
|         |             | Percp-e710   | Invitrogen  | 46-5791-82  | 4278076  | 1/400    |
| Ly51    | 6C3         | PE-Cy7       | Biolegend   | 108313      | B215053  | 1/100    |
|         |             | PE           | Invitrogen  | 12-5891-83  | 4300066  | 1/1000   |
|         |             | Alexa 647    | Biolegend   | 108312      | B222435  | 1/400    |
| PDGFRa  | APA5        | BUV737       | BD          | 741789      | 3228775  | 1/200    |
|         |             | Alexa594     | Invitrogen  | 14-1401-82  |          | 1/100    |
|         |             | BV750        | BD          | 747220      |          | 1/100    |
| PDGFRb  | APB5        | SB600        | Invitrogen  | 63-1402-80  |          | 1/100    |
| CD104   | 346-11A     | PE-Cy7       | Biolegend   | 123615      | B343426  | 1/200    |
|         |             | BV711        | BD          | 743082      |          | 1/150    |
| L1CAM   | 555         | PE           | RD system   | AAYQ0223061 | FAB5674P | 1/100    |
| Ly6D    | 49-H4       | eFluor450    | eBio        | 48-597480   | 2020836  | 1/200    |
| PDPN    | 8.1.1       | APC-Fire750  | Biolegend   | 127425      | B313124  | 1/200    |
|         |             | BUV805       | BD (custom) | 624287      |          | 1/650    |
|         |             | Purified     | Biolegend   | 127402      | B219285  | 1/100    |
|         | Alexa 647   | Anti-IgG     | Invitrogen  | A-21451     | 2527971  | 1/100    |

|             |            |             |                |           |            |        |
|-------------|------------|-------------|----------------|-----------|------------|--------|
| CD26        | H194-112   | BUV737      | BD             | 741729    |            | 1/20   |
| CD62P       | RB40.34    | BV480       | BD             | 746249    |            | 1/300  |
| CD309       | Avas12a    | BUV661      | BD             | 741571    |            | 1/50   |
| CD9         | KMC8       | BUV563      | BD             | 741270    |            | 1/50   |
| Claudin-3   | Polyclonal | Purified    | Invitrogen     | 34-1700   | Y1376567   | 1/100  |
| Anti-Rabbit | Secondary  | APC         | Invitrogen     | A31573    | 1786284    | 1/400  |
| UEA1        | Lectin     | Fitc        | VectorLabs     | FL-1061   | ZC0426     | 1/1000 |
|             |            | Biotin      | VectorLabs     | B1065     | ZD0810     | 1/200  |
|             |            | Strep-BV605 | Biolegend      | 405229    | B387251    | 1/1000 |
| pAKT        | Polyclonal | Pac Blue    | Cell Signaling | 68035S    | 1          | 1/100  |
| FOXN1       | 2/41       | Alexa 647   | Gift           | N/A       | N/A        |        |
| DCLK1       | aa690-720  | BV421       | Lsbio          | LSC100746 | 134142     | 1/1000 |
| GP2         | 2F11-C3    | Alexa 594   | MBL            | D278-3    | 010        | 1/100  |
| GFP         | GFP-1020   | Dylight 488 | Aves           | GFP-1020  | GFP3717982 | 1/1000 |

**Supplementary Table 13: Antibodies for immunofluorescence.**

|  | <b>Antigen</b> | <b>Format</b> | <b>Vendor</b> | <b>Catalog#</b> |
|--|----------------|---------------|---------------|-----------------|
|--|----------------|---------------|---------------|-----------------|

|           |                  |          |                                      |             |
|-----------|------------------|----------|--------------------------------------|-------------|
| Primaries | pan-Cytokeratin  | Purified | Dako                                 | Z0622       |
|           | Keratin 5        | Purified | Biolegend                            | poly19055   |
|           | anti-mouse K8/18 | Purified | Developmental Studies Hybridoma Bank | TROMA-1     |
|           | Keratin 14       | Purified | Abcam                                | EPR17350    |
|           | AIRE             | Purified | WEHI                                 | Clone# 5H12 |
|           | DCLK1            | Purified | LSBio                                | LS-C100746  |
|           | UEA1 lectin      | Purified | Vector labs                          | B-1065      |

|             |                        |                  |            |         |
|-------------|------------------------|------------------|------------|---------|
| Secondaries | Donkey anti-rabbit IgG | Alexa Fluor® 647 | Invitrogen | A31573  |
|             | Goat anti-rat IgG      | Alexa Fluor® 647 | Invitrogen | A-21247 |
|             | Streptavidin conjugate | Alexa Fluor® 647 | Invitrogen | S21374  |
