# Supplementary material for: Age-related epithelial defects limit thymic function and regeneration
Source: PubMed Central journal article supplement (PMC11362016; doi:10.1038/s41590-024-01915-9), 2024-08-07
Supplement: 41590_2024_1915_MOESM2_ESM.pdf [file 41590_2024_1915_MOESM2_ESM.pdf]

## Reporting Summary

Nature Portfolio wishes to improve the reproducibility of the work that we publish. This form provides structure for consistency and transparency in reporting. For further information on Nature Portfolio policies, see our [Editorial Policies](#) and the [Editorial Policy Checklist](#).

### Statistics

For all statistical analyses, confirm that the following items are present in the figure legend, table legend, main text, or Methods section.

n/a Confirmed

- The exact sample size ( $n$ ) for each experimental group/condition, given as a discrete number and unit of measurement
- A statement on whether measurements were taken from distinct samples or whether the same sample was measured repeatedly
- The statistical test(s) used AND whether they are one- or two-sided  
*Only common tests should be described solely by name; describe more complex techniques in the Methods section.*
- A description of all covariates tested
- A description of any assumptions or corrections, such as tests of normality and adjustment for multiple comparisons
- A full description of the statistical parameters including central tendency (e.g. means) or other basic estimates (e.g. regression coefficient) AND variation (e.g. standard deviation) or associated estimates of uncertainty (e.g. confidence intervals)
- For null hypothesis testing, the test statistic (e.g.  $F$ ,  $t$ ,  $r$ ) with confidence intervals, effect sizes, degrees of freedom and  $P$  value noted  
*Give  $P$  values as exact values whenever suitable.*
- For Bayesian analysis, information on the choice of priors and Markov chain Monte Carlo settings
- For hierarchical and complex designs, identification of the appropriate level for tests and full reporting of outcomes
- Estimates of effect sizes (e.g. Cohen's  $d$ , Pearson's  $r$ ), indicating how they were calculated

*Our web collection on [statistics for biologists](#) contains articles on many of the points above.*

### Software and code

Policy information about [availability of computer code](#)

**Data collection** Cells were sorted on an Aria II (BD Biosciences) using FACSDiva (BD Biosciences, Franklin Lakes, NJ). Flow cytometry analysis was performed on a Fortessa X-50 or Symphony A6 using FACSDiva Software (BD Biosciences). Sequencing data were collected on Illumina Nextseq or Novaseq platforms. Tissue sections were imaged on a Zeiss LSM 880 confocal microscope. Whole thymic lobes were scanned using a Zeiss Z.1 Lightsheet microscope.

**Data analysis**

#1. Flow cytometry data were analyzed using FlowJo (v10.7.1, TreeStar Software) and GraphPad Prism (v10; GraphPad Software, LLC). Data was collected and cells sorted on BD cytometers using FACSDiva software.

#2. All single cell RNA-seq data were analyzed using Cell Ranger (v7.0.1; 10x Genomics). The shunPykeR adapted Jupyter notebooks, R notebooks, and the assorted conda (.yaml) and renv (renv.lock) environment files to reproduce analyses and figure creation for this manuscript can be found at <https://github.com/kousaa/Kousa-et-al-2024-NI>. The app.R code that launches the ThymoSight app, together with the python notebooks used to create consistent annotation fields, reanalyze and integrate the public datasets with ours have been submitted on GitHub at <https://github.com/FredHutch/thymosight>. The server hosting the interactive app can be accessed at [www.thymosight.org](http://www.thymosight.org). Environments and packages can be found listed below.

#3. Other software: GSEA (v4.3.2); Cytoscape (v3.10.0);

#4. Bulk RNA-seq data were analyzed with FastQC (v0.11.9); Trimmomatic (); STAR aligner (v2.7.0e); featureCounts (v1.6.3)

#5. All images shown are processed using Imaris 9.7.1 (Bitplane).

## Environment names and requirements for scRNAseq analysis:

name: Kousa-et-al-2024-NI (main), channels: conda-forge, defaults, dependencies: -alabaster=0.7.12, -anndata=0.8.0, -appnope=0.1.2, -argon2-cffi=21.3.0, -argon2-cffi-bindings=21.2.0, -arpack=3.7.0, -asttokens=2.0.5, -attrs=21.4.0, -babel=2.10.3, -backcall=0.2.0, -beautifulsoup4=4.11.1, -bleach=4.1.0, -brotli=1.0.9, -brotli-bin=1.0.9, -brotli-python=1.0.9, -bz2=1.0.8, -ca-certificates=2022.6.15.1, -certifi=2022.6.15.1, -cffi=1.15.1, -charset-normalizer=2.1.1, -colorama=0.4.5, -cryptography=37.0.4, -cyclor=0.11.0, -debugpy=1.5.1, -decorator=5.1.1, -defusedxml=0.7.1, -docutils=0.19, -entrypoints=0.4, -executing=0.8.3, -fonttools=4.37.1, -freetype=2.10.4, -glpk=4.65, -gmp=6.2.1, -h5py=3.7.0, -hdf5=1.10.6, -icu=58.2, -igraph=0.9.10, -imagesize=1.4.1, -importlib-metadata=4.11.4, -importlib\_metadata=4.11.4, -importlib\_resources=5.2.0, -ipykernel=6.15.2, -ipython=8.4.0, -ipython\_genutils=0.2.0, -jedi=0.18.1, -jinja2=3.0.3, -joblib=1.1.0, -jpeg=9e, -jsonschema=4.4.0, -jupyter\_client=7.3.5, -jupyter\_core=4.10.0, -jupyterlab\_pygments=0.1.2, -kiwisolver=1.4.4, -lcms2=2.12, -leidenalg=0.8.10, -libblas=3.9.0, -libbrotlicommon=1.0.9, -libbrotlidec=1.0.9, -libbrotlienc=1.0.9, -libcblas=3.9.0, -libcxx=14.0.6, -libffi=3.3, -libgfortran=4.0.0, -libgfortran4=7.5.0, -libiconv=1.17, -liblapack=3.9.0, -libllvml11=11.1.0, -libopenblas=0.3.12, -libpng=1.6.37, -libsodium=1.0.18, -libtiff=4.2.0, -libwebp-base=1.2.4, -libxml2=2.9.14, -llvmlite=0.38.0, -lz4-c=1.9.3, -markupsafe=2.1.1, -matplotlib-base=3.5.3, -matplotlib-inline=0.1.6, -metis=5.1.0, -mistune=0.8.4, -mpfr=4.1.0, -munkres=1.1.4, -natsort=8.2.0, -nbclient=0.5.13, -nbconvert=6.4.4, -nbformat=5.3.0, -ncurses=6.3, -nest-asyncio=1.5.5, -networkx=2.8.6, -notebook=6.4.12, -numba=0.55.1, -olefile=0.46, -openssl=1.1.1q, -packaging=21.3, -pandas=1.4.4, -pandocfilters=1.5.0, -parso=0.8.3, -patsy=0.5.2, -pexpect=4.8.0, -pickleshare=0.7.5, -pip=22.1.2, -prometheus\_client=0.14.1, -prompt-toolkit=3.0.20, -psutil=5.9.0, -ptyprocess=0.7.0, -pure\_eval=0.2.2, -pycparser=2.21, -pygments=2.11.2, -pynndescent=0.5.7, -pyopenssl=22.0.0, -pyparsing=3.0.9, -pyrsistent=0.18.0, -pysocks=1.7.1, -python=3.8.13, -python-dateutil=2.8.2, -python-fastjsonschema=2.16.2, -python-igraph=0.9.11, -python\_abi=3.8, -pytz=2022.2.1, -pyzmq=23.2.0, -readline=8.1.2, -scanpy=1.9.1, -scikit-learn=1.1.2, -scipy=1.5.3, -seaborn=0.12.0, -seaborn-base=0.12.0, -send2trash=1.8.0, -session-info=1.0.0, -setuptools=63.4.1, -six=1.16.0, -snowballstemmer=2.2.0, -soupsieve=2.3.1, -sphinx=5.1.1, -sphinxcontrib-applehelp=1.0.2, -sphinxcontrib-devhelp=1.0.2, -sphinxcontrib-htmlhelp=2.0.0, -sphinxcontrib-jsmath=1.0.1, -sphinxcontrib-qthelp=1.0.3, -sphinxcontrib-serializinghtml=1.1.5, -sqlite=3.39.2, -stack\_data=0.2.0, -statsmodels=0.13.2, -stdlib-list=0.7.0, -suitesparse=5.10.1, -tbb=2021.5.0, -terminado=0.13.1, -testpath=0.6.0, -texttable=1.6.4, -threadpoolctl=3.1.0, -tk=8.6.12, -tornado=6.2, -tqdm=4.64.1, -traitlets=5.1.1, -typing\_extensions=4.3.0, -typing\_extensions=4.3.0, -umap-learn=0.5.3, -unicodedata2=14.0.0, -urllib3=1.26.11, -wcwidth=0.2.5, -webencodings=0.5.1, -wheel=0.37.1, -xz=5.2.5, -zeromq=4.3.4, -zipp=3.8.0, -zlib=1.2.12, -zstd=1.4.9, -pip; -aniso8601==9.0.1, -anndata2ri==1.1, -annoy==1.17.1, -backports-zoneinfo==0.2.1, -biomart==0.9.2, -chardet==4.0.0, -click==8.1.3, -cmake==3.24.1.1, -cython==0.29.32, -dunamai==1.13.0, -et-xmlfile==1.1.0, -fa2==0.3.5, -fbpca==1.0, -fcsparser==0.2.4, -feather-format==0.4.1, -flask==1.1.2, -flask-cors==3.0.10, -flask-restful==0.3.9, -geosketch==1.2, -get-version==3.5.4, -harmonypy==0.0.6, -harmonys==0.1.4, -idna==2.10, -imageio==2.22.1, -intervaltree==3.1.0, -itsdangerous==2.1.2, -loompy==3.0.7, -moussipy==0.0.5, -nbstripout==0.6.1, -numexpr==2.8.3, -numpy==1.20.2, -numpy-groupies==0.9.19, -openpyxl==3.0.10, -palantir==1.0.1, -phenograph==1.5.7, -pillow==9.2.0, -pyarrow==9.0.0, -pyreadr==0.4.6, -python-slugify==5.0.2, -pytz-deprecation-shim==0.1.0.post0, -pywavelets==1.3.0, -requests==2.25.1, -rpy2==3.5.4, -scanorama==1.7.2, -scikit-image==0.19.3, -scrublet==0.2.3, -scvelo==0.2.4, -sklearn==0.0, -sortedcontainers==2.4.0, -tables==3.7.0, -text-unidecode==1.3, -tiffiff==2022.8.12, -tzdata==2022.2, -tzlocal==4.2, -watermark==2.3.1, -werkzeug==2.2.2, -wrapt==1.15.0, -xlrd==2.0.1, -xlsxwriter==3.0.3

name: Kousa-et-al-2024-NI (dynamo), channels: defaults, dependencies: -anyio=4.2.0, -appnope=0.1.2, -argon2-cffi=21.3.0, -argon2-cffi-bindings=21.2.0, -asttokens=2.0.5, -async-lru=2.0.4, -babel=2.11.0, -beautifulsoup4=4.12.2, -bleach=4.1.0, -brotli-python=1.0.9, -bz2=1.0.8, -ca-certificates=2023.12.12, -certifi=2024.2.2, -cffi=1.16.0, -charset-normalizer=2.0.4, -comm=0.1.2, -debugpy=1.6.7, -decorator=5.1.1, -defusedxml=0.7.1, -executing=0.8.3, -ipykernel=6.28.0, -ipython=8.20.0, -jedi=0.18.1, -json5=0.9.6, -jsonschema=4.19.2, -jsonschema-specifications=2023.7.1, -jupyter-lsp=2.2.0, -jupyter\_client=8.6.0, -jupyter\_core=5.5.0, -jupyter\_events=5.0.0, -jupyter\_server=2.10.0, -jupyter\_server\_terminals=0.4.4, -jupyterlab=4.0.11, -jupyterlab\_pygments=0.1.2, -jupyterlab\_server=2.25.1, -libcxx=14.0.6, -libffi=3.4.4, -libsodium=1.0.18, -matplotlib-inline=0.1.6, -mistune=2.0.4, -nbclient=0.8.0, -nbconvert=7.10.0, -nbformat=5.9.2, -ncurses=6.4, -nest-asyncio=1.6.0, -notebook=7.0.8, -notebook-shim=0.2.3, -openssl=3.0.13, -overrides=7.4.0, -pandocfilters=1.5.0, -parso=0.8.3, -pexpect=4.8.0, -pip=23.3.1, -prometheus\_client=0.14.1, -prompt-toolkit=3.0.43, -prompt\_toolkit=3.0.43, -psutil=5.9.0, -ptyprocess=0.7.0, -pure\_eval=0.2.2, -pycparser=2.21, -pysocks=1.7.1, -python=3.11.8, -python-fastjsonschema=2.16.2, -python-json-logger=2.0.7, -pyyaml=6.0.1, -pyzmq=25.1.2, -readline=8.2, -referencing=0.30.2, -requests=2.31.0, -rfc3339-validator=0.1.4, -rfc3986-validator=0.1.1, -rpdpy==0.10.6, -send2trash=1.8.2, -setuptools=68.2.2, -six=1.16.0, -sniffio=1.3.0, -soupsieve=2.5, -sqlite=3.41.2, -stack\_data=0.2.0, -terminado=0.17.1, -tinycss2=1.2.1, -tk=8.6.12, -tornado=6.3.3, -traitlets=5.7.1, -typing\_extensions=4.9.0, -urllib3=2.1.0, -wcwidth=0.2.5, -webencodings=0.5.1, -websocket-client=0.58.0, -wheel=0.41.2, -xz=5.4.6, -yaml=0.2.5, -zeromq=4.3.5, -zlib=1.2.13, -pip; -abs-py==2.1.0, -aiohttp==3.9.3, -aiosignal==1.3.1, -anndata==0.10.5.post1, -array-api-compat==1.4.1, -attrs==23.2.0, -cellrank==2.0.3.dev5+g721c59f, -cfgv==3.4.0, -chex==0.1.85, -click==8.1.7, -colorcet==3.1.0, -contextlib2==21.6.0, -contourpy==1.2.0, -cyclor==0.12.1, -distlib==0.3.8, -docrep==0.3.2, -dunamai==1.19.2, -dynamo-release==1.4.0, -et-xmlfile==1.1.0, -etils==1.7.0, -filelock==3.13.1, -flax==0.8.1, -fonttools==4.49.0, -frozenlist==1.4.1, -fsspec==2024.2.0, -get-version==3.5.5, -h5py==3.10.0, -identify==2.5.35, -idna==3.6, -igraph==0.10.8, -importlib-resources==6.1.2, -jax==0.4.25, -jaxlib==0.4.25, -jinja2==3.0.3, -joblib==1.3.2, -kiwisolver==1.4.5, -lightning==2.1.4, -lightning-utilities==0.10.1, -llvmlite==0.42.0, -loompy==3.0.7, -louvain==0.8.0, -markdown-it-py==3.0.0, -markupsafe==2.1.5, -matplotlib==3.6.3, -mdurl==0.1.2, -ml-collections==0.1.1, -ml-dtypes==0.3.2, -mpmath==1.3.0, -msgpack==1.0.8, -mudata==0.2.3, -multidict==6.0.5, -multipledispatch==1.0.0, -natsort==8.4.0, -networkx==3.2.1, -nodeenv==1.8.0, -numba==0.59.0, -numdifftools==0.9.41, -numpy==1.26.4, -numpy-groupies==0.10.2, -numpyro==0.13.2, -openpyxl==3.1.2, -opt-einsum==3.3.0, -optax==0.1.9, -orbax-checkpoint==0.5.3, -packaging==23.2, -pandas==2.2.1, -patsy==0.5.6, -pillow==10.2.0, -platformdirs==4.2.0, -pre-commit==3.6.2, -progressbar2==4.4.1, -protobuf==4.25.3, -pygam==0.9.1, -pygments==2.17.2, -pygpcca==1.0.4, -pynndescent==0.5.11, -pyparsing==3.1.1, -pyro-api==0.1.2, -pyro-ppl==1.9.0, -python-dateutil==2.9.0, -python-utilities==3.8.2, -pytorch-lightning==2.2.0.post0, -pytz==2024.1, -rich==13.7.1, -scanpy==1.9.8, -scikit-learn==1.1.3, -scipy==1.11.4, -scvelo==0.3.1, -scvi-tools==1.1.1, -seaborn==0.13.2, -session-info==1.0.0, -statsmodels==0.14.1, -stdlib-list==0.10.0, -sympy==1.12, -tensorstore==0.1.54, -texttable==1.7.0, -threadpoolctl==3.3.0, -toolz==0.12.1, -torch==2.2.1, -torchmetrics==1.3.1, -tqdm==4.66.2, -typing\_extensions==4.10.0, -tzdata==2024.1, -umap-learn==0.5.5, -virtualenv==20.25.1, -wrapt==1.16.0, -yaml==1.9.4, -zipp==3.17.0

name: Kousa-et-al-2024-NI (thymosight), channels: -conda-forge, -defaults, dependencies: -anndata=0.10.5.post1, -anyio=4.2.0, -appnope=0.1.2, -argon2-cffi=21.3.0, -argon2-cffi-bindings=21.2.0, -arpack=3.8.0, -array-api-compat=1.4.1, -asttokens=2.0.5, -async-lru=2.0.4, -attrs=23.1.0, -babel=2.11.0, -beautifulsoup4=4.12.2, -bleach=4.1.0, -brotli=1.1.0, -brotli-bin=1.1.0, -brotli-python=1.0.9, -bz2=1.0.8, -c-ares=1.27.0, -ca-certificates=2024.2.2, -cached-property=1.5.2, -cached\_property=1.5.2, -certifi=2024.2.2, -cffi=1.16.0, -charset-normalizer=2.0.4, -colorama=0.4.6, -contourpy=1.2.0, -cyclor=0.12.1, -debugpy=1.6.7, -decorator=5.1.1, -defusedxml=0.7.1, -exceptiongroup=1.2.0, -executing=0.8.3, -fonttools=4.25.0, -freetype=2.12.1, -get-annotations=0.1.2, -glpk=5.0, -gmp=6.3.0, -h5py=3.10.0, -hdf5=1.14.3, -icu=73.2, -idna=3.4, -igraph=0.10.10, -ipykernel=6.28.0, -ipython=8.20.0, -jedi=0.18.1, -jinja2=3.1.3, -joblib=1.3.2, -json5=0.9.6, -jsonschema=4.19.2, -jsonschema-specifications=2023.7.1, -jupyter-lsp=2.2.0, -jupyter\_client=8.6.0, -jupyter\_core=5.5.0, -jupyter\_events=0.8.0, -jupyter\_server=2.10.0, -jupyter\_server\_terminals=0.4.4, -jupyterlab=4.0.11, -jupyterlab\_pygments=0.1.2, -jupyterlab\_server=2.25.1, -kiwisolver=1.4.5, -krb5=1.21.2, -lcms2=2.16, -leidenalg=0.10.2, -lerc=4.0.0, -libaics=1.1.2, -libblas=3.9.0, -libbrotlicommon=1.1.0, -libbrotlidec=1.1.0, -libbrotlienc=1.1.0, -libcblas=3.9.0, -libcurl=8.5.0, -libcxx=16.0.6, -libdeflate=1.19, -

libedit=3.1.20191231, libev=4.33, libexpat=2.5.0, libffi=3.4.4, libgfortran=5.0.0, libgfortran5=13.2.0, libhwloc=2.9.3, libiconv=1.17, libjpeg-turbo=3.0.0, liblapack=3.9.0, libltdl=2.0.11, liblvm14=14.0.6, libnghttp2=1.58.0, libopenblas=0.3.26, libpng=1.6.43, libsodium=1.0.18, libsqlite=3.45.1, libssh2=1.11.0, libtiff=4.6.0, libwebp-base=1.3.2, libxcb=1.15, libxml2=2.12.5, libzlib=1.2.13, llvmpopenmp=17.0.6, llvmlite=0.42.0, markupsafe=2.1.3, matplotlib-base=3.8.3, matplotlib-inline=0.1.6, mistune=2.0.4, munkres=1.1.4, natsort=8.4.0, nbclient=0.8.0, nbconvert=7.10.0, nbformat=5.9.2, ncurse=6.4, nest-asyncio=1.6.0, networkx=3.2.1, notebook=7.0.8, notebook-shim=0.2.3, numba=0.59.0, numpy=1.26.4, openjpeg=2.5.0, openssl=3.2.1, overrides=7.4.0, packaging=23.1, pandas=2.2.1, pandocfilters=1.5.0, parso=0.8.3, patsy=0.5.6, pexpect=4.8.0, pillow=10.2.0, pip=23.3.1, platformdirs=3.10.0, prometheus-client=0.14.1, prompt-toolkit=3.0.43, prompt\_toolkit=3.0.43, psutil=5.9.0, pthread-stubs=0.4, ptyprocess=0.7.0, pure\_eval=0.2.2, pycparser=2.21, pygments=2.15.1, pynndescent=0.5.11, pyparsing=3.1.1, pysocks=1.7.1, python=3.11.8, python-dateutil=2.8.2, python-fastjsonschema=2.16.2, python-igraph=0.11.4, python-json-logger=2.0.7, python-tzdata=2024.1, python\_abi=3.11, pytz=2023.3.post1, pyyaml=6.0.1, pyzmq=25.1.2, readline=8.2, referencing=0.30.2, requests=2.31.0, rfc3339-validator=0.1.4, rfc3986-validator=0.1.1, rpdspy=0.10.6, scanpy=1.9.8, scikit-learn=1.4.1.post1, scipy=1.12.0, seaborn=0.13.2, seaborn-base=0.13.2, send2trash=1.8.2, session-info=1.0.0, setuptools=68.2.2, six=1.16.0, sniffio=1.3.0, soupsieve=2.5, sqlite=3.41.2, stack\_data=0.2.0, statsmodels=0.14.1, stdlib-list=0.10.0, tbb=2021.11.0, terminado=0.17.1, texttable=1.7.0, threadpoolctl=3.3.0, tinyccs2=1.2.1, tk=8.6.13, tornado=6.3.3, tqdm=4.66.2, traitlets=5.7.1, typing-extensions=4.9.0, typing\_extensions=4.9.0, tzdata=2024a, umap-learn=0.5.5, urllib3=2.1.0, wcwidth=0.2.5, webencodings=0.5.1, websocket-client=0.58.0, wheel=0.41.2, xorg-libxau=1.0.11, xorg-libxdmcp=1.1.3, xz=5.4.5, yaml=0.2.5, zeromq=4.3.5, zlib=1.2.13, zstd=1.5.5, pip;, annoy=1.17.3, biomart=0.9.2, comm=0.2.1, cython=3.0.8, et-xmlfile=1.1.0, harmonypy=0.0.6, imageio=2.34.0, ipywidgets=8.1.2, jupyterlab-widgets=3.0.10, lazy-loader=0.3, openpyxl=3.1.2, scikit-image=0.22.0, scrublet=0.2.3, tifffile=2024.2.12, widgetsnbextension=4.0.10

name: Kousa-et-al-NI (cellchat), R=4.2.2, Bioconductor=3.15, Python: 3.8.2 (virtualenv), packages: BBmisc=1.13, BH=1.78.0-0, Biobase=2.56.0, BiocGenerics=0.42.0, BiocManager=1.30.19, BiocParallel=1.30.4, BiocVersion=3.15.2, CellChat=1.4.0, ComplexHeatmap=2.12.1, DBI=1.1.3, DelayedArray=0.22.0, DelayedMatrixStats=1.18.2, DropletUtils=1.16.0, EnhancedVolcano=1.14.0, FNN=1.1.3.1, Formula=1.2-4, GenomInfoDb=1.32.4, GenomInfoDbData=1.2.8, GenomicRanges=1.48.0, GetoptLong=1.0.5, GlobalOptions=0.1.2, HDF5Array=1.24.2, Hmisc=4.7-1, IRanges=2.30.1, KernSmooth=2.23-20, MASS=7.3-58.1, MAST=1.22.0, Matrix=1.5-3, MatrixGenerics=1.8.1, MatrixModels=0.5-1, NMF=0.24.0, R.methodsS3=1.8.2, R.oo=1.25.0, R.utils=2.12.2, R6=2.5.1, RANN=2.6.1, RColorBrewer=1.1-3, RCurl=1.98-1.9, ROCr=1.0-11, RSpectra=0.16-1, Rcpp=1.0.9, RcppAnnoy=0.0.20, RcppArmadillo=0.11.4.2.1, RcppEigen=0.3.3.9.3, RcppProgress=0.4.2, RcppTOML=0.1.7, Rhdf5lib=1.18.2, Rtsne=0.16, S4Vectors=0.34.0, Seurat=4.3.0, SeuratObject=4.1.3, SingleCellExperiment=1.18.1, SparseM=1.81, SummarizedExperiment=1.26.1, TSP=1.2-1, UpSetR=1.4.0, XVector=0.36.0, abind=1.4-5, anndata=0.7.5.3, arm=1.13-1, arrow=10.0.0, askpass=1.1, assertthat=0.2.1, backports=1.4.1, base64enc=0.1-3, beachmat=2.12.0, bit=4.0.5, bit64=4.0.5, bitops=1.0-7, blob=1.2.3, boot=1.3-28.1, brew=1.0-7, brio=1.1.3, broom=1.0.1, bslib=0.4.1, ca=0.71.1, caTools=1.18.2, cachem=1.0.6, callr=3.7.3, car=3.1-1, carData=3.0-5, cellranger=1.1.0, checkmate=2.1.0, circlize=0.4.15, cli=3.4.1, clipr=0.8.0, clue=0.3-63, cluster=2.1.4, coda=0.19-4, codetools=0.2-18, colorspace=2.0-3, commonmark=1.8.1, corrplot=0.92, cowplot=1.1.1, cpp11=0.4.3, crayon=1.5.2, credentials=1.3.2, crosstalk=1.2.0, curl=4.3.3, data.table=1.14.6, dbplyr=2.1.1, deldir=1.0-6, dendextend=1.16.0, desc=1.4.2, devtools=2.4.3, dichromat=2.0-0.1, diffobj=0.3.5, digest=0.6.31, doParallel=1.0.17, dplyr=1.0.10, dqrng=0.3.0, dtplyr=1.2.2, edgeR=3.38.4, egg=0.4.5, ellipsis=0.3.2, emmeans=1.8.2, estimability=1.4.1, evaluate=0.19, expm=0.999-6, fansi=1.0.3, farver=2.1.1, fastmap=1.1.0, feather=0.3.5, figpatch=0.2, fitdistrplus=1.1-8, fontawesome=0.4.0, forcats=0.5.2, foreach=1.5.2, foreign=0.8-83, formatR=1.12, formattable=0.2.1, fs=1.5.2, futile.logger=1.4.3, futile.options=1.0.1, future=1.29.0, future.apply=1.10.0, gargle=1.2.1, gclus=1.3.2, generics=0.1.3, gert=1.6.0, ggalluvial=0.12.3, ggcorrplot=0.1.4, ggplot2=3.4.0, ggplotify=0.1.0, ggpubr=0.5.0, ggrepel=0.9.2, ggridges=0.5.4, ggsci=2.9, ggsignif=0.6.4, gh=1.3.0=0.1.1, globals=0.16.2, glue=1.6.2, goftest=1.2-3, googledrive=2.0.0, googlesheets4=1.0.1, gplots=3.1.3, gprofiler2=0.2.1, gridBase=0.4-7, gridExtra=2.3, gridGraphics=0.5-1, gtable=0.3.1, gtools=3.9.4, haven=2.5.1, heatmaply=1.4.0, here=1.0.1, highr=0.9, hms=1.1.2, htmlTable=2.4.1, htmltools=0.5.4, htmlwidgets=1.5.4, httpuv=1.6.6, httr=1.4.4, ica=1.0-3, ids=1.0.1, igraph=1.3.5, ini=0.3.1, interp=1.1-3, iriba=2.3.5.1, isoband=0.2.6, iterators=1.0.14, jpeg=0.1-9, jquerylib=0.1.4, jsonlite=1.8.4, knitr=1.41, labeling=0.4.2, lambda.r=1.2.4, later=1.3.0, lattice=0.20-45, latticeExtra=0.6-30, lazyeval=0.2.2, lifecycle=1.0.3, limma=3.52.4, listenv=0.8.0, lme4=1.1-31, lmtest=0.9-40, locfit=1.5-9.6, lubridate=1.8.0, magick=2.7.3, magrittr=2.0.3, mapproj=1.2.9, maps=3.4.1, matrixStats=0.63.0, memoise=2.0.1, mgcv=1.8-41, mime=0.12, miniUI=0.1.1.1, minqa=1.2.5, modelr=0.1.9, munsell=0.5.0, mvtnorm=1.1-3, naniar=0.6.1, network=1.17.2, nlme=3.1-160, nloptr=2.0.3, nnet=7.3-18, norm=1.0-10.0, numDeriv=2016.8-1.1, openssl=2.0.5, openxlsx=4.2.5.1, pacman=0.5.1, pals=1.7, parallelly=1.32.1, patchwork=1.1.2, pbapply=1.6.0, pbkrtest=0.5.1, pheamap=1.0.12, pillar=1.8.1, pkgbuild=1.3.1, pkgconfig=2.0.3, pkgload=1.3.2, pkgmaker=0.32.2, plotly=4.10.1, plyr=1.8.8, png=0.1-8, polyclip=1.10-4, polynom=1.4-1, praise=1.0.0, prettyunits=1.1.1, processx=3.8.0, progress=1.2.2, progressr=0.12.0, promises=1.2.0.1, ps=1.7.2, purrr=0.3.5, qap=0.1-2, quantreg=5.94, rappdirs=0.3.3, rcmdcheck=1.4.0, readr=2.1.3, readxl=1.4.1, registry=0.5-1, rematch=1.0.1, rematch2=2.1.2, remotes=2.4.2, renv=0.15.5, reprex=2.0.2, reshape2=1.4.4, reticulate=1.26, rhdf5=2.40.0, rhdf5filters=1.8.0, rjson=0.2.21, rlang=1.0.6, rmarkdown=2.17, rngtools=1.5.2, roxygen2=7.1.2, rpart=4.1.19, rprojroot=2.0.3, rstatis=0.7.1, rstudioapi=0.13, rversions=2.1.1, rvest=1.0.3, sass=0.4.4, scCB2=1.6.0, scales=1.2.1, scattermore=0.8, sctransform=0.3.5, scuttle=1.6.3, selectr=0.4-2, seriation=1.4.0, sessioninfo=1.2.2, shape=1.4.6, shiny=1.7.3, sitmo=2.0.2, sna=2.7, snow=0.4-4, sourcetools=0.1.7, sp=1.5-1, sparseMatrixStats=1.8.0, spatstat.data=3.0-0, spatstat.explore=3.0-5, spatstat.geom=3.0-3, spatstat.random=3.0-1, spatstat.sparse=3.0-0, spatstat.utils=3.0-1, statnet.common=4.6.0, stringi=1.7.8, stringr=1.5.0, survival=3.4-0, svglite=2.1.0, sys=3.4.1, systemfonts=1.0.4, tensor=1.5, testthat=3.1.6, tibble=3.1.8, tidyr=1.2.1, tidyselect=1.2.0, tidyverse=1.3.2, tinytex=0.42, tzdb=0.3.0, usethis=2.1.5, utf8=1.2.2, uuid=1.1-0, uwot=0.1.14, vctrs=0.5.1, viridis=0.6.2, viridisLite=0.4.1, visdat=0.5.3, vroom=1.6.0, waldo=0.4.0, webshot=0.5.4, whisker=0.4, withr=2.5.0, xfun=0.35, xml2=1.3.3, xopen=1.0.0, xtable=1.8-4, yaml=2.3.6, yulab.utils=0.0.5, zip=2.2.0, zlibbioc=1.42.0, zoo=1.8-11

For manuscripts utilizing custom algorithms or software that are central to the research but not yet described in published literature, software must be made available to editors and reviewers. We strongly encourage code deposition in a community repository (e.g. GitHub). See the Nature Portfolio [guidelines for submitting code & software](#) for further information.

## Data

Policy information about [availability of data](#)

All manuscripts must include a [data availability statement](#). This statement should provide the following information, where applicable:

- Accession codes, unique identifiers, or web links for publicly available datasets
- A description of any restrictions on data availability
- For clinical datasets or third party data, please ensure that the statement adheres to our [policy](#)

Sequencing data generated in this study have been deposited in NCBI's Gene Expression Omnibus (GEO) and can be accessed through the GEO SuperSeries accession number GSE240020. Accession numbers for publicly available raw count data that have been re-analyzed for this study are listed here: (i) [Mouse] > Kernfeld et al. (2018) [GSE107910]; Bornstein et al. (2018) [GSE103967]; Dhalla et al. (2019) [https://www.ebi.ac.uk/biostudies/arrayexpress/studies/E-MTAB-8105#]; Baran-Gale et al. (2020) [https://bioconductor.org/packages/release/data/experiment/html/MouseThymusAgeing.html]; Wells et al. (2020) [GSE137699]; Rota et al. (2021) [GSE162668]; Nusser et al. (2022) [GSE106856]; Michelson et al. (2022) [GSE194253]; Klein et al. (2023) [GSE215418]; Farley et al. (2023) [GSE232765]; Givony et al. (2023) [GSE236075]; Michelson et al. (2023) [GSE225661]; Horie et al. (2023) [GSE228198] and (ii) [Human] > Park et al. (2020) [https://zenodo.org/records/3711134]; Bautista et al. (2021) [GSE147520]; Ragazzini et al. (2023) [GSE220830, GSE220206, GSE220829]. The re-analyzed public datasets with added metadata can be accessed at 10.5281/zenodo.12516405.

## Research involving human participants, their data, or biological material

Policy information about studies with [human participants or human data](#). See also policy information about [sex, gender \(identity/presentation\), and sexual orientation](#) and [race, ethnicity and racism](#).

|                                                                    |                                                                                                                                                                                                                                                                            |
|--------------------------------------------------------------------|----------------------------------------------------------------------------------------------------------------------------------------------------------------------------------------------------------------------------------------------------------------------------|
| Reporting on sex and gender                                        | Thymus tissues were obtained from the archives of the Duke University Department of Pathology as FFPE sections. All tissues were used anonymously, with recording of only patient age, gender, and surgical diagnosis. We show images from one 50 year old female patient. |
| Reporting on race, ethnicity, or other socially relevant groupings | N/A                                                                                                                                                                                                                                                                        |
| Population characteristics                                         | Histology analysis of thymus derived from the Duke University human thymus tissue bank of a de-identified 50 year old female was used in the study                                                                                                                         |
| Recruitment                                                        | N/A                                                                                                                                                                                                                                                                        |
| Ethics oversight                                                   | All human tissues were collected according to a protocol approved by the Duke University Institutional Review Board.                                                                                                                                                       |

Note that full information on the approval of the study protocol must also be provided in the manuscript.

## Field-specific reporting

Please select the one below that is the best fit for your research. If you are not sure, read the appropriate sections before making your selection.

Life sciences  Behavioural & social sciences  Ecological, evolutionary & environmental sciences

For a reference copy of the document with all sections, see [nature.com/documents/nr-reporting-summary-flat.pdf](https://nature.com/documents/nr-reporting-summary-flat.pdf)

## Life sciences study design

All studies must disclose on these points even when the disclosure is negative.

|                 |                                                                                                                                                                                                                                                                                                                                                                                                                                                                                                                                                                                                                                                                                                                                                                                                                                                                                                                                                                                                                                                   |
|-----------------|---------------------------------------------------------------------------------------------------------------------------------------------------------------------------------------------------------------------------------------------------------------------------------------------------------------------------------------------------------------------------------------------------------------------------------------------------------------------------------------------------------------------------------------------------------------------------------------------------------------------------------------------------------------------------------------------------------------------------------------------------------------------------------------------------------------------------------------------------------------------------------------------------------------------------------------------------------------------------------------------------------------------------------------------------|
| Sample size     | Sample sizes were based on previously published work and preliminary studies, the effect size (difference between groups/standard deviation) for each study was estimated, and sample sizes were calculated using G*Power (v3.1.9.2) (Faul et al. 2009 Behavior Res Meth. 41:1149-1160) for an alpha=0.05 and beta=0.8.                                                                                                                                                                                                                                                                                                                                                                                                                                                                                                                                                                                                                                                                                                                           |
| Data exclusions | No samples were excluded from scRNA-seq, visium or flow cytometry datasets.<br><br>scRNA-seq cell exclusions: Quality of the single cells was computationally assessed based on total counts, number of genes, mitochondrial and ribosomal fraction per cell, with low total counts, low number of genes ( $\leq 1000$ ) and high mitochondrial content ( $\geq 0.2$ ) as negative indicators of cell quality. Cells characterized by more than one negative indicator were considered as "bad" quality cells. Although cells were negatively sorted prior to sequencing for the CD45 marker, a small amount of CD45+ cells (expressing Ptpnc), and also a few parathyroid cells (expressing Gcm2), were detected within our dataset. To remove bad quality cells and contaminants in an unbiased way, we assessed them in a cluster basis rather than individually. Leiden clusters with a "bad" quality profile and/or a high number of contaminating cells were removed. Finally, cells marked as doublets by scrublet were also filtered out. |
| Replication     | In general variation within groups and between experiments was low, however to take into account inter-experimental variation all experiments were performed at least twice and in no instance were experiments discarded due to conflicting findings. To account for intra-                                                                                                                                                                                                                                                                                                                                                                                                                                                                                                                                                                                                                                                                                                                                                                      |

experimental variation, particularly for in vitro studies, several wells per conditions were assessed with primary sample material coming from at least two different mice. In vitro experiments were performed independently at least three times.

**Randomization** No specific method of randomization was used. However, for all experiments, mouse cages were randomly allocated to each group after balancing of age and sex.

**Blinding** Due to practical considerations in experimental design and the fact that aged mice are typically easy to distinguish from young mice, the performing investigator was not typically blinded to the group allocation during the experiments.

## Reporting for specific materials, systems and methods

We require information from authors about some types of materials, experimental systems and methods used in many studies. Here, indicate whether each material, system or method listed is relevant to your study. If you are not sure if a list item applies to your research, read the appropriate section before selecting a response.

### Materials & experimental systems

| n/a                                 | Involved in the study                                           |
|-------------------------------------|-----------------------------------------------------------------|
| <input type="checkbox"/>            | <input checked="" type="checkbox"/> Antibodies                  |
| <input checked="" type="checkbox"/> | <input type="checkbox"/> Eukaryotic cell lines                  |
| <input checked="" type="checkbox"/> | <input type="checkbox"/> Palaeontology and archaeology          |
| <input type="checkbox"/>            | <input checked="" type="checkbox"/> Animals and other organisms |
| <input checked="" type="checkbox"/> | <input type="checkbox"/> Clinical data                          |
| <input checked="" type="checkbox"/> | <input type="checkbox"/> Dual use research of concern           |
| <input checked="" type="checkbox"/> | <input type="checkbox"/> Plants                                 |

### Methods

| n/a                                 | Involved in the study                              |
|-------------------------------------|----------------------------------------------------|
| <input checked="" type="checkbox"/> | <input type="checkbox"/> ChIP-seq                  |
| <input type="checkbox"/>            | <input checked="" type="checkbox"/> Flow cytometry |
| <input checked="" type="checkbox"/> | <input type="checkbox"/> MRI-based neuroimaging    |

## Antibodies

Antibodies used

The antibodies used were rabbit anti-pan-Cytokeratin (Dako, Cat# Z0622), anti-K5 (BioLegend, Cat# poly19055), rat anti-mouse K8/18 (Troma-1; Developmental Studies Hybridoma Bank, Iowa City), rabbit anti-K14 (AbCam, Cat# EPR17350), rat anti-mouse AIRE (WEHI, Clone# 5H12), rabbit anti-human/mouse DCLK1 (LSBio, Cat# LS-C100746), biotinylated UEA-1 lectin (Vector labs, USA, Cat# B-1065). The secondary antibodies used were Alexa Fluor® 647 Donkey anti-rabbit IgG (H+L) (Invitrogen, Cat# A31573), Alexa Fluor® 647 Goat anti-rat IgG (H+L) (Invitrogen, Cat# A-21247), Alexa Fluor™ 647 Streptavidin conjugate (Invitrogen, Cat# S21374).

For flow cytometry and cell sorting, surface antibodies against CD45 (30-F11), CD31 (390 or MEC13.3), TER-119 (TER-119), MHC-II IA/IE (M5/114.15.2), EpCAM (G8.8), Ly51 (6C3), PDGFRα (APA5), CD104 (346-11A), L1CAM (555), Ly6D (49-H4), Gp38 (8.1.1), CD26 (H194-112), CD62P (RB40.34), podoplanin (8.1.1), CD62P (RB40.34), CD9 (KMC8), and CD309 (Avas12a) were purchased from BD Biosciences (Franklin Lakes, NJ), BioLegend (San Diego, CA) or eBioscience (San Diego, CA). Ulex europaeus agglutinin 1 (UEA1), was purchased from Vector Laboratories (Burlingame, CA). Antibodies against phosphoAKT was purchased from Cell Signaling Technologies (Danvers, MA); Claudin-3 and anti-rabbit secondary were purchased from Invitrogen (Thermo-Fisher, Waltham, MA); DCLK1 (aa690-720) was purchased from LSBio (Seattle, WA); GP2 (2F11-C3) was purchased from MBL Life Science; and anti-GFP (Aves GFP-1020) was purchased from AvesLabs (Davis, CA). Anti-FOXN1 antibody was a gift from Hans Reimer-Rodewald. A detailed table outlining specific vendors, fluorochromes, catalog numbers, lot numbers and dilutions has been included in a separate data table.

Validation

Isotype and fluorescent-minus one controls were used to set gates.

## Animals and other research organisms

Policy information about [studies involving animals](#); [ARRIVE guidelines](#) recommended for reporting animal research, and [Sex and Gender in Research](#)

Laboratory animals

Inbred male and female C57BL/6J mice were obtained from Jackson Laboratories or through the National Institute of Aging mouse colony. Foxn1tdTomato mice were generated by crossing Foxn1-cre (Jax 018448) with B6.Cg-Gt(ROSA)26Sortm14(CAG-tdTomato)Hze/J mice (Jax 007914). Foxn1nTnG mice were generated by crossing Foxn1-cre (Jax 018448) with ROSAnT-nG mice (Jax 023537). Foxn1z/z mice were generated as previously described. As an aging study, we used mice across the lifespan at 2 months-old, 6mo, 9mo, 12mo, and 18-24mo. Animal rooms were kept in a constant temperature of 72 degrees (+/- 3 degrees) Fahrenheit with humidity set between 30%-70% as recommended in the "Guide for the Care and Use of Lab Animals". Light cycles were set for 12 hours on and 12 hours off.

Wild animals

No wild animals were used in this study.

Reporting on sex

All mouse ages and sexes are reported in figure legends

Field-collected samples

No field collected samples were used in this study.

Ethics oversight

All studies were performed under approved Institutional Animal Care and Use Committee (or equivalent) protocols at Memorial

Note that full information on the approval of the study protocol must also be provided in the manuscript.

## Flow Cytometry

### Plots

Confirm that:

- The axis labels state the marker and fluorochrome used (e.g. CD4-FITC).
- The axis scales are clearly visible. Include numbers along axes only for bottom left plot of group (a 'group' is an analysis of identical markers).
- All plots are contour plots with outliers or pseudocolor plots.
- A numerical value for number of cells or percentage (with statistics) is provided.

### Methodology

Sample preparation

Thymus was enzymatically digested following and adapted protocol. Briefly, thymi were mechanically dissociated into 1-2 mm pieces. Tissue pieces were incubated with a digestion buffer (either, RPMI with 10% FCS, 62.5  $\mu\text{m}/\text{mL}$  liberase TM, 0.4 mg/ml DNase I; or RPMI with 25mM HEPES, 20 $\mu\text{g}/\mu\text{L}$  DNase1, and 1mg/mL Collagenase/Dispase). Between incubation steps, supernatant containing dissociated cells were transferred to tubes equipped with 100  $\mu\text{m}$  filter. Cells were pelleted by centrifugation at 400g for 5 min. All steps were performed at 4°C unless indicated. For sequencing experiments, cell pellets were incubated with anti-mouse CD45 microbeads and CD45+ cells were depleted from cell suspension using magnetic-associated cell sorting (MACS) on LS columns according to manufacturer's protocol. Following red blood cell lysis using ACK buffer, the CD45-depleted cell fraction was incubated with an antibody cocktail for 15 min at 4 C and cells of interest were purified by fluorescent-associated cell sorting (FACS) on a BD Biosciences Aria II using a 100  $\mu\text{m}$  nozzle. Cells were sorted into tubes containing RPMI supplemented with 2% BSA. FACS-purified cells were spun down at 400g for 5 min and resuspended in PBS supplemented with 0.04 % BSA for generation of single-cell suspensions.

Instrument

Cells sorting was performed on a BD Biosciences Aria II or S6 using a 100  $\mu\text{m}$  nozzle. Cells were analysed on a ????

Software

Flow cytometry was analyzed using FACSDiva (BD Biosciences) or FlowJo (Treestar Software).

Cell population abundance

For sort experiments, cell purity was typically >99% as checked using a post-sort purity check by flow cytometry.

Gating strategy

All gating have been outlined in the manuscript.

- Tick this box to confirm that a figure exemplifying the gating strategy is provided in the Supplementary Information.
